# Supplementary material for: The Inhibition of Microcystin Adsorption by Microplastics in the Presence of Algal Organic Matters
Source: MDPI journal article supplement (doi:10.3390/toxics10060339), 2022-06-20
Supplement: s1 [file s1]

**Supporting information**

The inhibition of microcystin adsorption by microplastics in the presence of algal organic matters

**Bingran Tang <sup>1</sup>, Ying Tang <sup>2</sup>, Xin Zhou <sup>1</sup>, Mengzi Liu <sup>1</sup>, Hong Li <sup>1,\*</sup> and Jun Qi <sup>3,\*</sup>**

1 Key Laboratory of Eco-Environment of Three Gorges Region, Ministry of Education, Chongqing University, Chongqing 400044, China; tangbingrancqu@163.com (B.T.); zhouxincqu@163.com (X.Z.); liumengzicqu@sina.com (M.L.)

2 Chongqing Key Laboratory of Soil Multi-Scale Interfacial Process, Department of Soil Science, College of Re-sources and Environment, Southwest University, Chongqing 400715, China; yingtang@swu.edu.cn

3 Department of hepatobiliary pancreatic tumor center, Chongqing University Cancer Hospital, Chongqing 400045, China

\* Correspondence: hongli@cqu.edu.cn (H.L.); yunshen315@13.com (J.Q.)

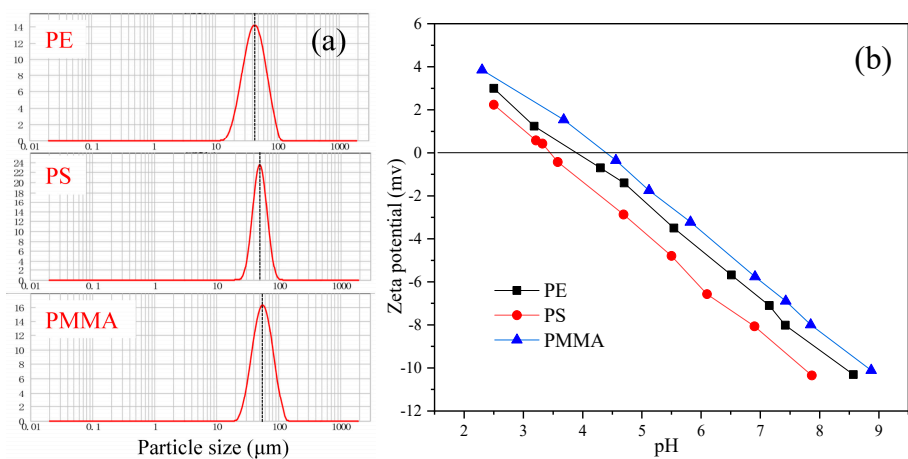

Figure S1 (a) Particle size distribution; (b) Zeta potential of the studied microplastic

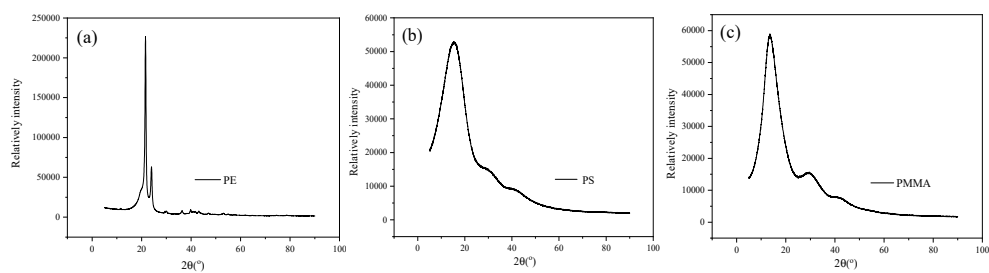

Figure S2 XRD patterns of (a) PE; (b) PS and (c) PMMA.

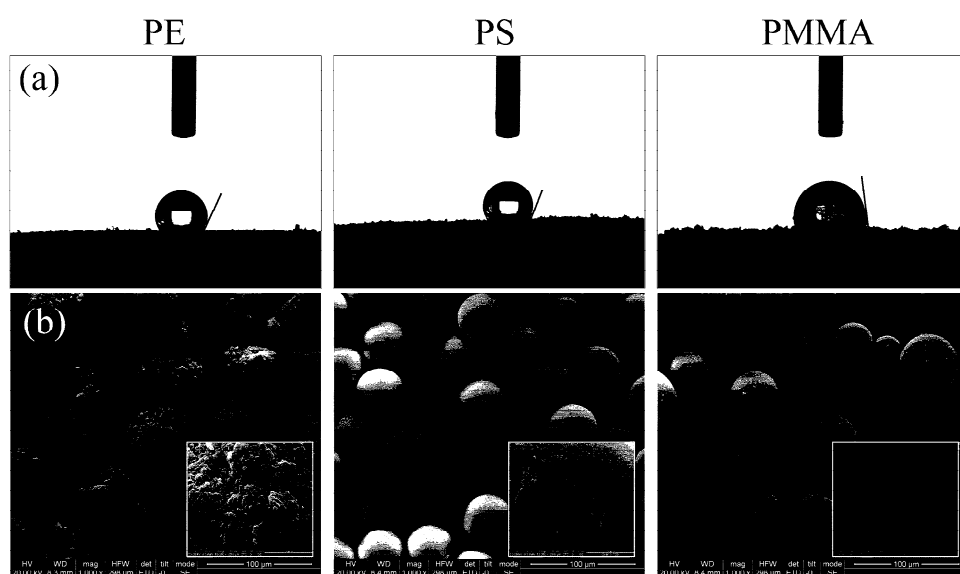

Figure S3 Microscopic images of contact angles(a) and SEM micrographs(b) of PE, PS and PMMA (magnification of 500×、2000×).

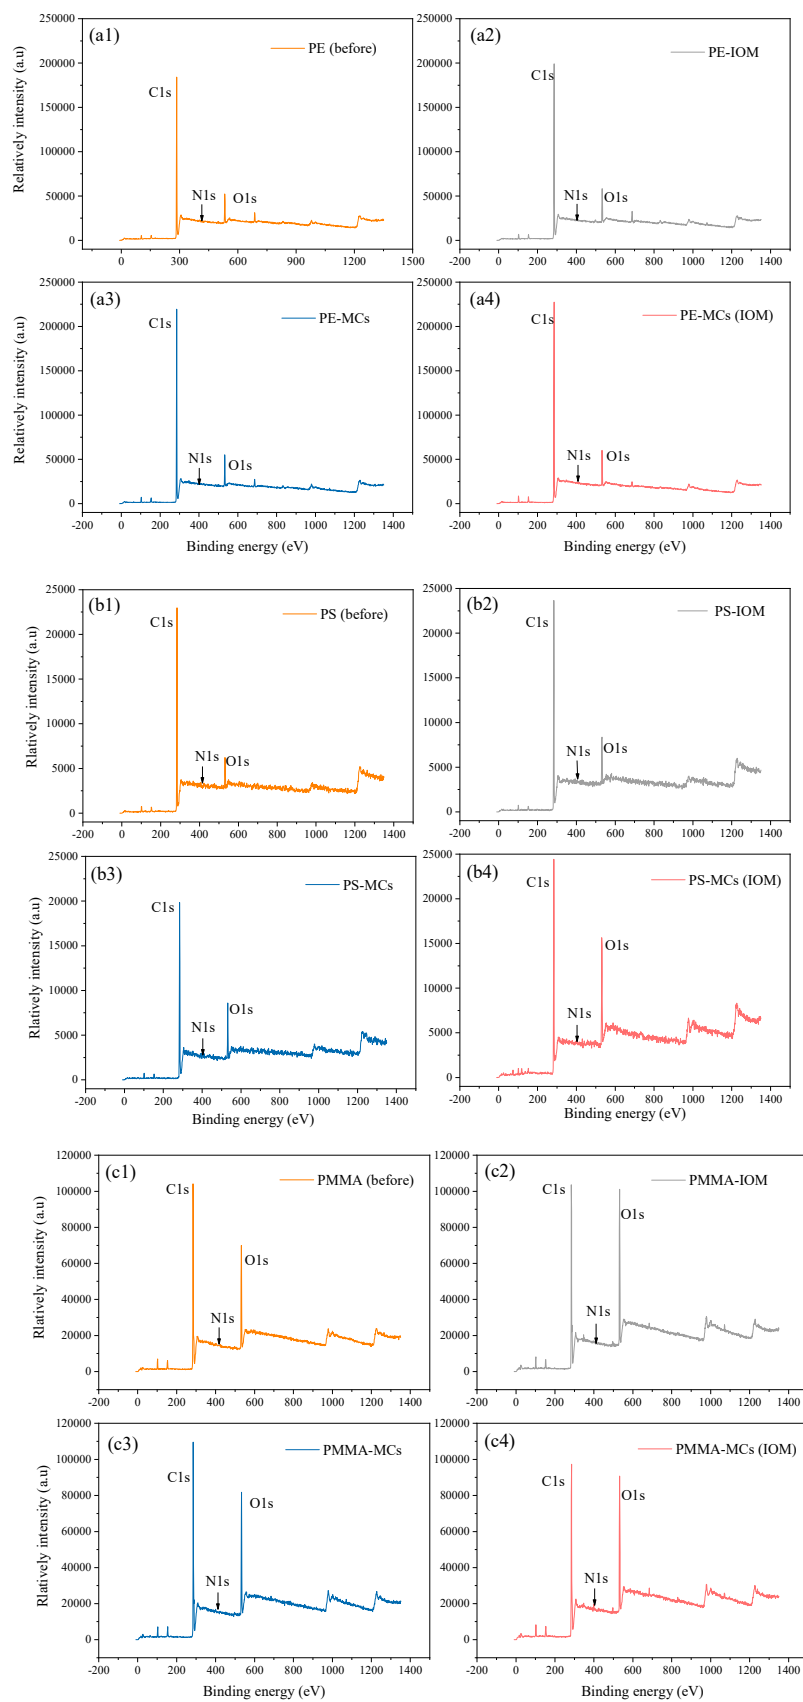

Figure S4 XPS spectra of survey scan of (a) PE; (b) PS and (c) PMMA before and after adsorption.

Table S1 Adsorption kinetics fitting parameters of MCs on microplastics

| MP Type | Pseudo first order        |                           |       | Pseudo second order       |                                    |       |
|---------|---------------------------|---------------------------|-------|---------------------------|------------------------------------|-------|
|         | $q_e$ ( $\mu\text{g/g}$ ) | $K_1$ ( $\text{h}^{-1}$ ) | $R^2$ | $q_e$ ( $\mu\text{g/g}$ ) | $K_2$ ( $\text{g}/\mu\text{g/h}$ ) | $R^2$ |
| PE      | 429                       | 0.726                     | 0.993 | 448                       | 0.00319                            | 0.999 |
| PS      | 477                       | 0.689                     | 0.997 | 503                       | 0.00255                            | 0.998 |
| PMMA    | 404                       | 0.711                     | 0.992 | 429                       | 0.00290                            | 0.998 |

Table S2 Adsorption kinetics fitting parameters of IOM on microplastics

| MP Type | Pseudo first order        |                           |       | Pseudo second order       |                                    |       |
|---------|---------------------------|---------------------------|-------|---------------------------|------------------------------------|-------|
|         | $q_e$ ( $\mu\text{g/g}$ ) | $K_1$ ( $\text{h}^{-1}$ ) | $R^2$ | $q_e$ ( $\mu\text{g/g}$ ) | $K_2$ ( $\text{g}/\mu\text{g/h}$ ) | $R^2$ |
| PE      | 839                       | 0.625                     | 0.948 | 952                       | 0.000793                           | 0.998 |
| PS      | 1150                      | 0.409                     | 0.941 | 1290                      | 0.000456                           | 0.997 |
| PMMA    | 747                       | 0.424                     | 0.982 | 813                       | 0.000800                           | 0.998 |

Table S3 Adsorption kinetics fitting parameters of MCs on microplastics at the presence of IOM

| MP Type | Pseudo first order        |                           |       | Pseudo second order       |                                    |       |
|---------|---------------------------|---------------------------|-------|---------------------------|------------------------------------|-------|
|         | $q_e$ ( $\mu\text{g/g}$ ) | $K_1$ ( $\text{h}^{-1}$ ) | $R^2$ | $q_e$ ( $\mu\text{g/g}$ ) | $K_2$ ( $\text{g}/\mu\text{g/h}$ ) | $R^2$ |
| PE      | 240                       | 0.520                     | 0.972 | 258                       | 0.00351                            | 0.999 |
| PS      | 305                       | 0.488                     | 0.986 | 326                       | 0.00272                            | 0.999 |
| PMMA    | 225                       | 0.391                     | 0.983 | 222                       | 0.00520                            | 0.996 |



Table S4 Carbon and oxygen content in the MPs before and after adsorption obtained through wide-scan XPS analyses.

| MPs  | Polymer Type      | C (%) | O (%) | C/O   |
|------|-------------------|-------|-------|-------|
| PE   | PE                | 91.1  | 8.48  | 10.74 |
|      | PE-IOM            | 89.69 | 9.5   | 9.44  |
|      | PE-MC-LR          | 91.65 | 7.79  | 11.77 |
|      | PE- MC-LR (IOM)   | 90.82 | 8.6   | 10.56 |
| PS   | PS                | 91.05 | 7.92  | 11.50 |
|      | PS-IOM            | 89.51 | 10.49 | 8.53  |
|      | PS- MC-LR         | 86.88 | 11.16 | 7.78  |
|      | PS- MC-LR (IOM)   | 78.5  | 20.39 | 3.85  |
| PMMA | PMMA (Before)     | 80.01 | 19.54 | 4.09  |
|      | PMMA-IOM          | 74.72 | 24.63 | 3.03  |
|      | PMMA- MC-LR       | 77.73 | 21.38 | 3.64  |
|      | PMMA- MC-LR (IOM) | 76.13 | 22.45 | 3.39  |
